# Supplementary material
Source: ML conference proceedings conference paper supplement (https://openaccess.thecvf.com/content/ICCV2023/html/Takmaz_3D_Segmentation_of_ICCV_2023_paper.html)
Supplement: Supplementary file 3 [file Takmaz_3D_Segmentation_of_ICCV_2023_supplemental.zip]

Archive with 4 entries (4 files):
- Human3D_supplementary_video.mp4
- __MACOSX/._Human3D_supplementary_video.mp4
- Human3D_supplementary_material.pdf
- __MACOSX/._Human3D_supplementary_material.pdf
